# Supplementary material
Source: PubMed Central journal article supplement (PMC5758054)
Supplement: NIHMS930423-supplement-Supporting_Information.pdf [file NIHMS930423-supplement-Supporting_Information.pdf]

## SUPPORTING INFORMATION

All NMR spectra were recorded in CDCl<sub>3</sub> and at 298 K, 600 MHz (<sup>1</sup>H) and 150 MHz (<sup>13</sup>C).

### TABLE OF CONTENTS

|                                                                                                                                                                                  |    |
|----------------------------------------------------------------------------------------------------------------------------------------------------------------------------------|----|
| S1. <sup>1</sup> H NMR spectrum of <b>1</b> .....                                                                                                                                | 2  |
| S2. <sup>13</sup> C NMR spectrum of <b>1</b> .....                                                                                                                               | 2  |
| S3. <sup>1</sup> H- <sup>1</sup> H COSY NMR spectrum of <b>1</b> .....                                                                                                           | 3  |
| S4. <sup>1</sup> H- <sup>1</sup> H TOCSY NMR spectrum of <b>1</b> .....                                                                                                          | 3  |
| S5. <sup>1</sup> H- <sup>13</sup> C HSQC NMR spectrum of <b>1</b> .....                                                                                                          | 4  |
| S6. <sup>1</sup> H- <sup>13</sup> C HMBC NMR spectrum of <b>1</b> .....                                                                                                          | 4  |
| S7. Nominal mass LC-MS/MS spectrum of <b>1</b> .....                                                                                                                             | 5  |
| S8. LC-MS chromatograms of Marfey's analysis hydrolysis and derivatization products of <b>1</b> , along with derivatized authentic amino acid standards for leucine .....        | 5  |
| S9. LC-MS chromatograms of Marfey's analysis hydrolysis and derivatization products of <b>1</b> , along with derivatized authentic amino acid standards for isoleucine.....      | 6  |
| S10. LC-MS chromatograms of Marfey's analysis hydrolysis and derivatization products of <b>1</b> , along with derivatized authentic amino acid standards for valine .....        | 7  |
| S11. LC-MS chromatograms of Marfey's analysis hydrolysis and derivatization products of <b>1</b> , along with derivatized authentic amino acid standards for phenylalanine ..... | 8  |
| S12. LC-MS chromatograms of Marfey's analysis hydrolysis and derivatization products of <b>1</b> , along with derivatized authentic amino acid standards for proline.....        | 9  |
| S13. Expanded view of the LC-MS/MS molecular network used to generate Figure 1 in the manuscript. 10                                                                             |    |
| S14. Molecular model coordinates for the energy minimized conformer of samoamide A ( <b>1</b> ; PDB format) .....                                                                | 11 |

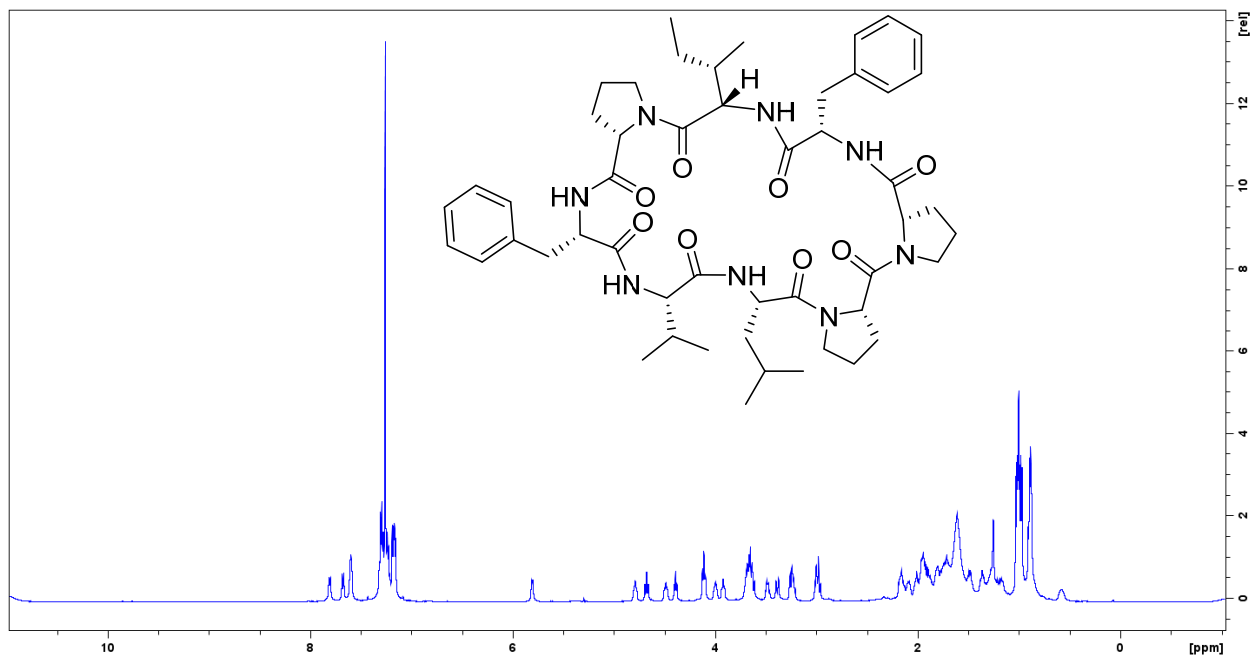

S1. <sup>1</sup>H NMR spectrum of **1**.

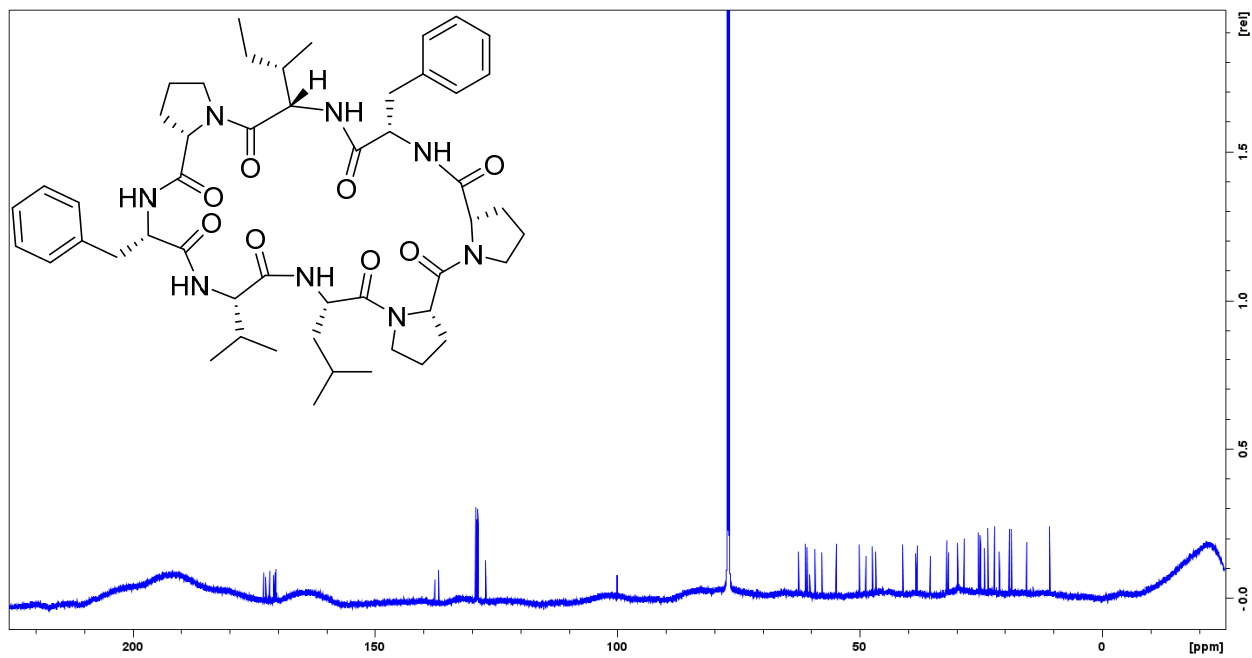

S2. <sup>13</sup>C NMR spectrum of **1**.

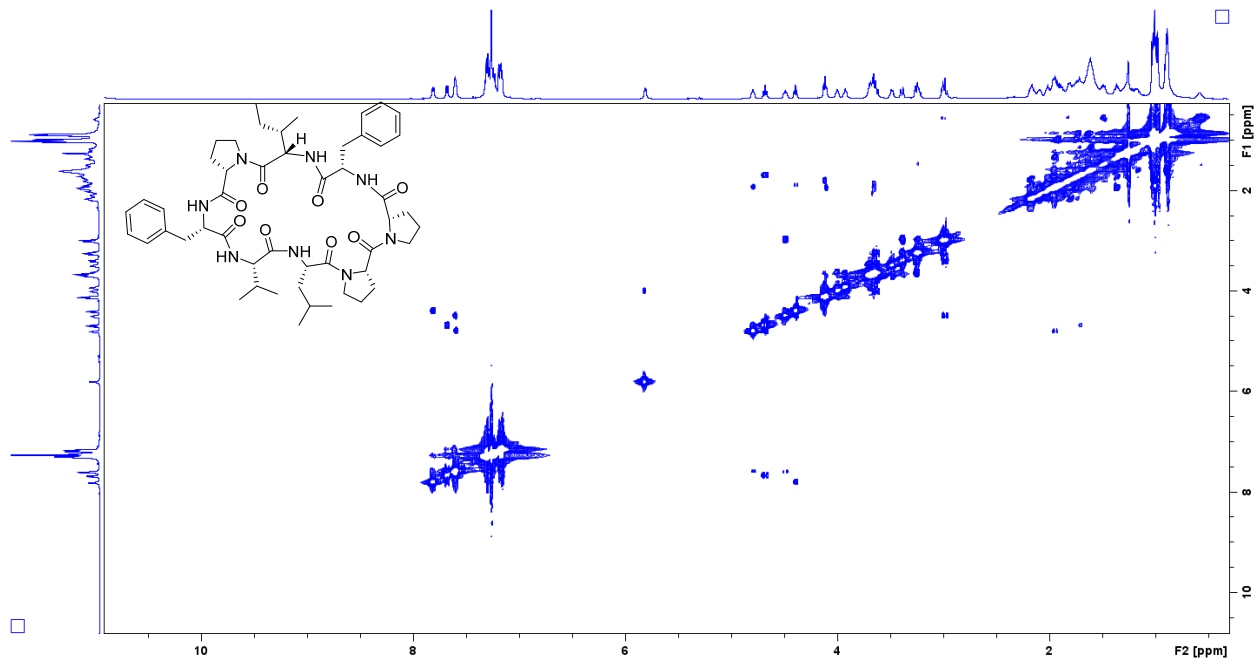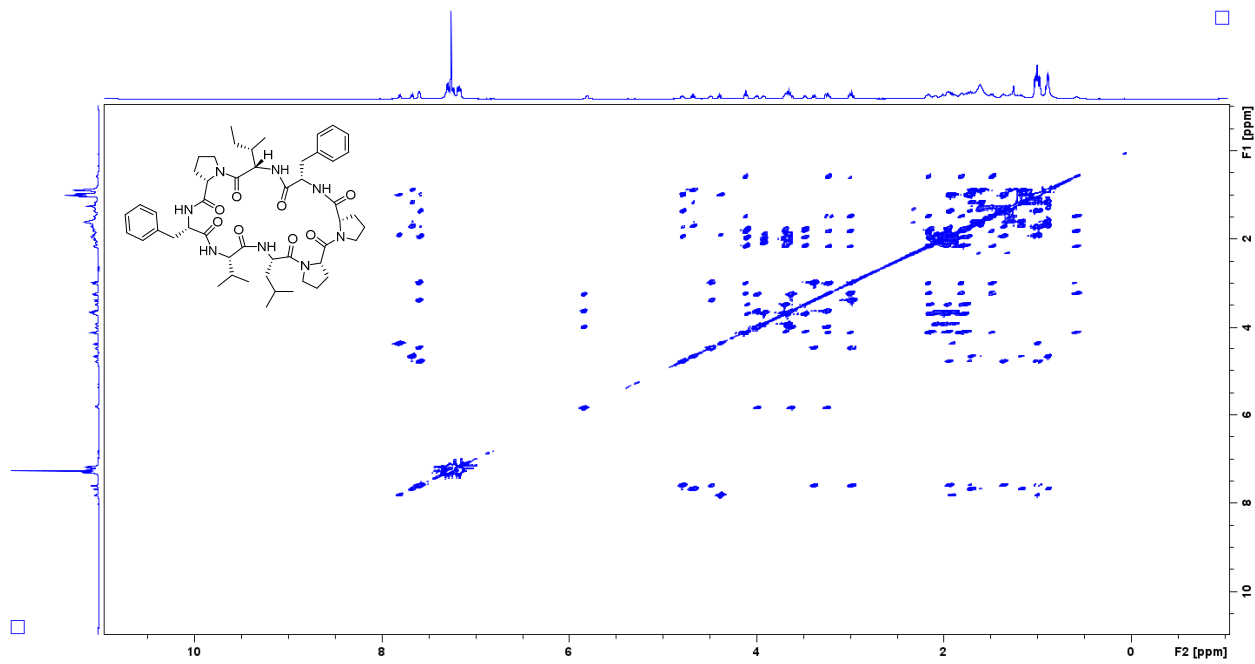

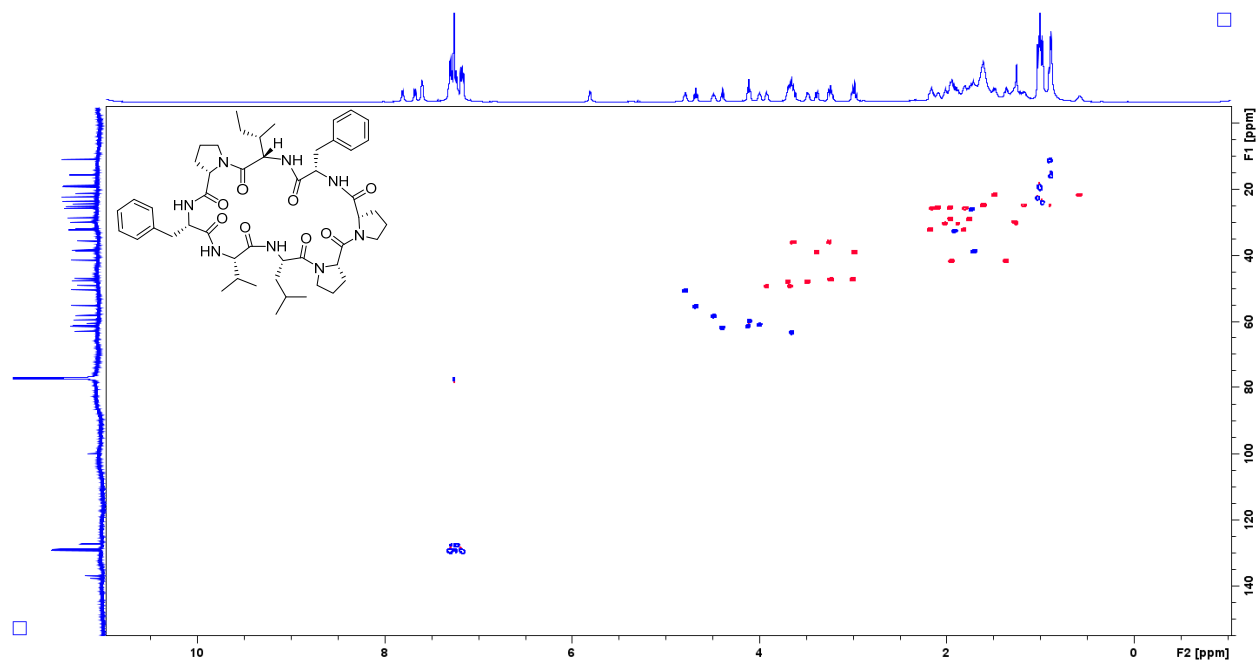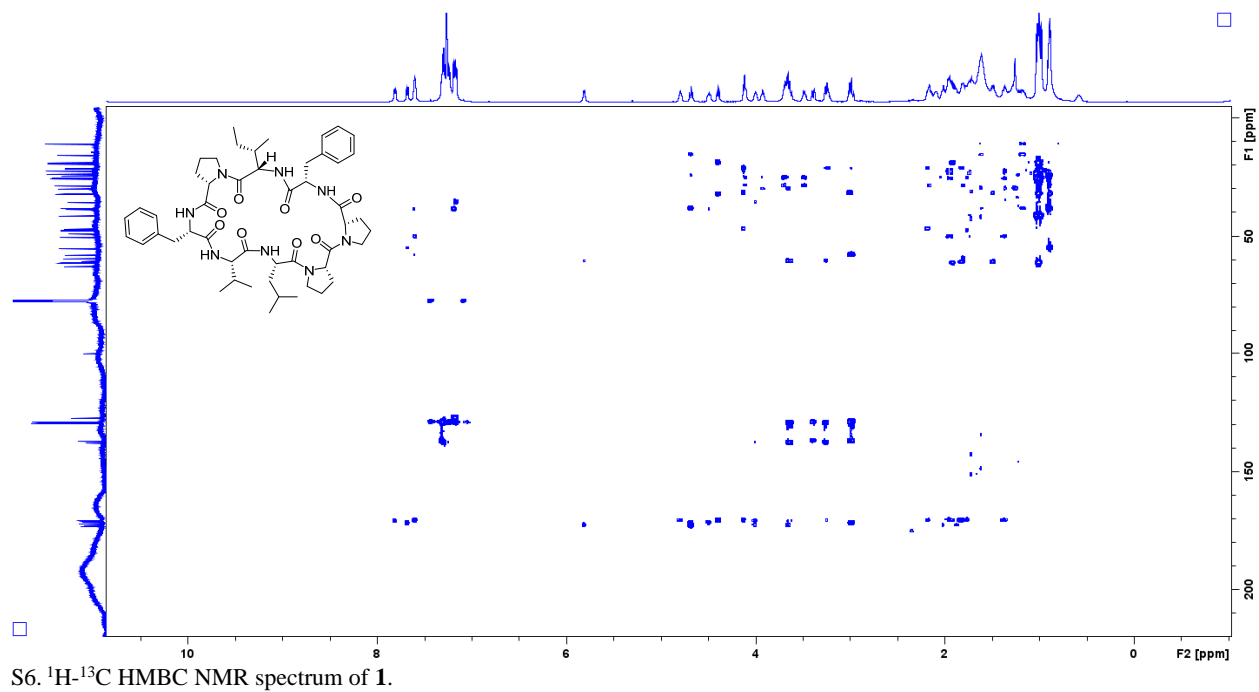

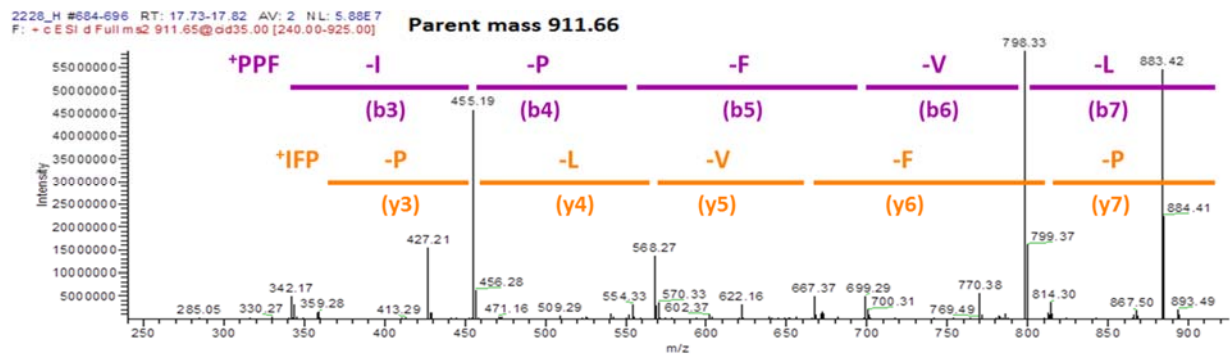

S7. Nominal mass LC-MS/MS spectrum of **1**.

RT: 0.00 - 50.00 SM: 3B

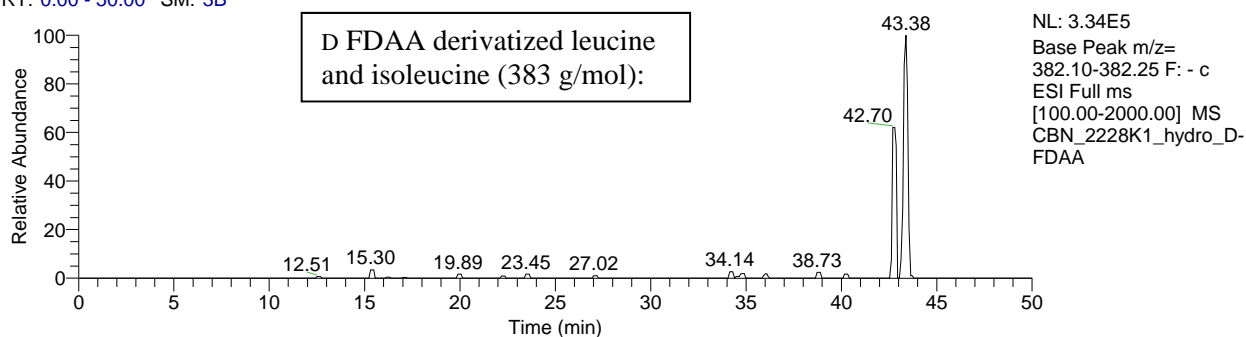

RT: 0.00 - 49.98 SM: 3B

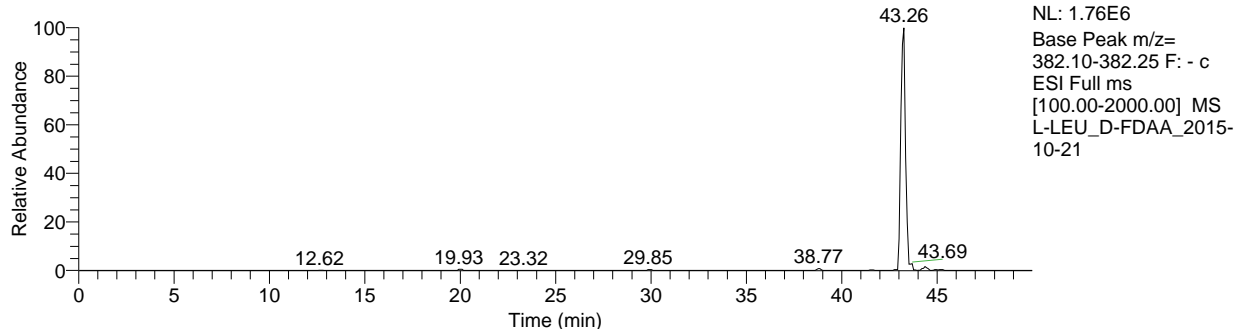

RT: 0.00 - 50.06 SM: 3B

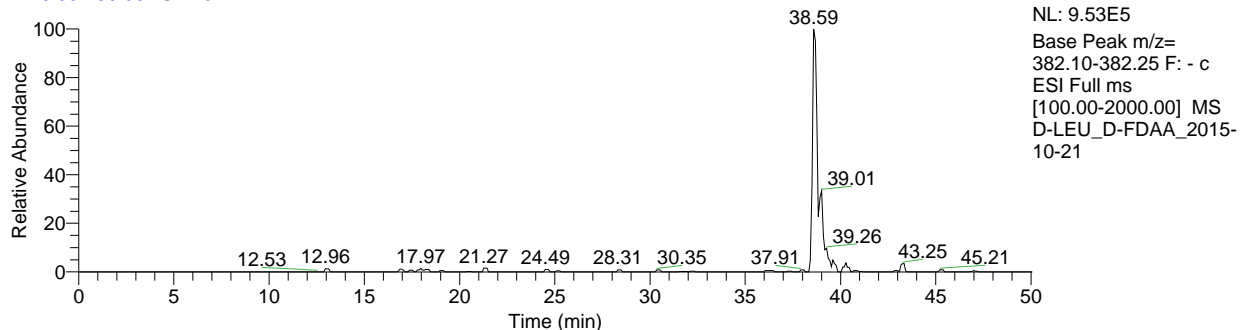

S8. LC-MS chromatograms of Marfey's analysis hydrolysis and derivatization products of **1**, along with derivatized authentic amino acid standards for leucine

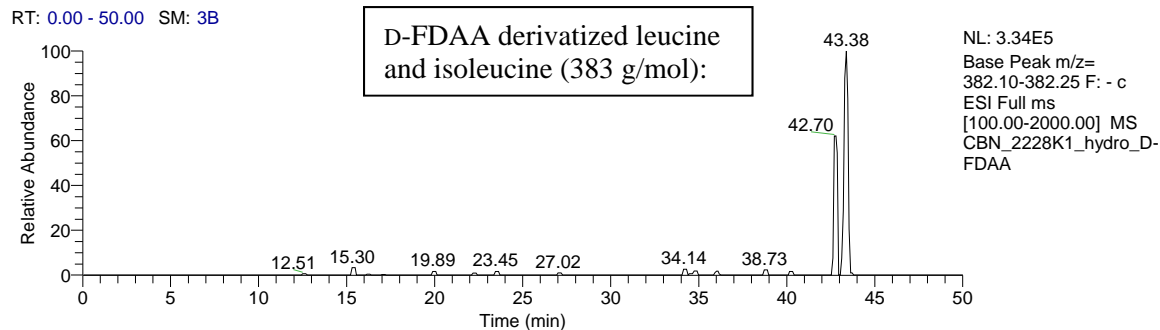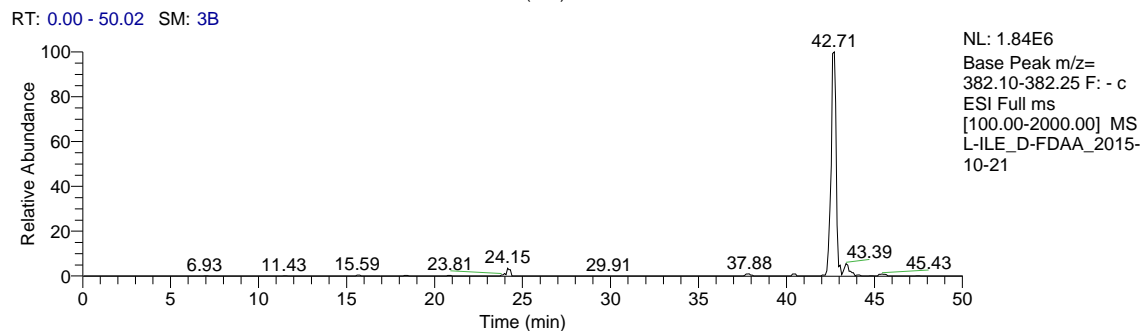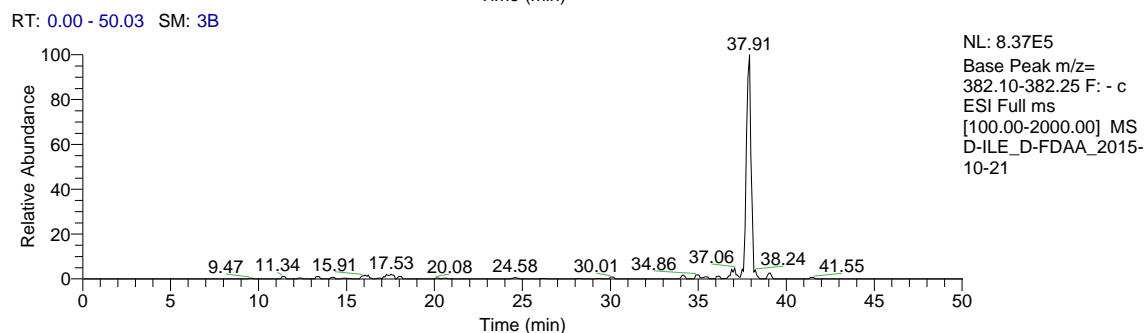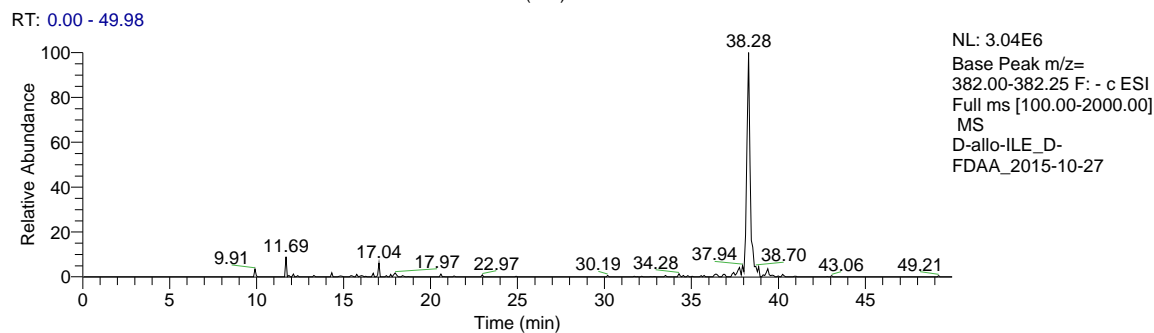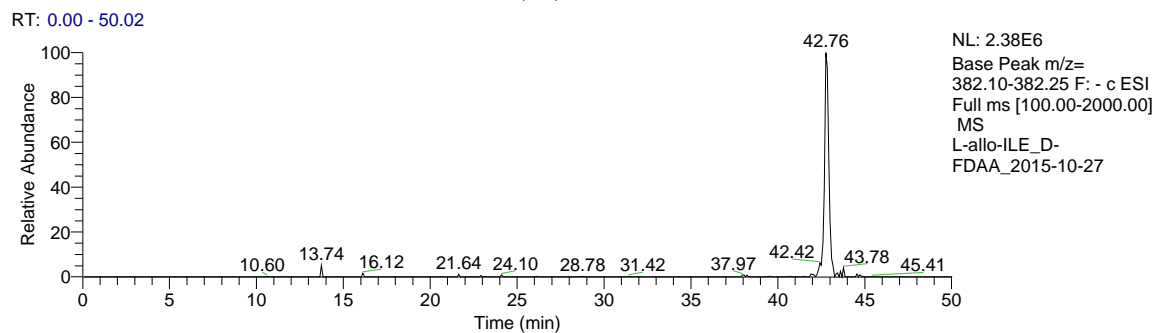

S9. LC-MS chromatograms of Marfey's analysis hydrolysis and derivatization products of 1, along with derivatized authentic amino acid standards for isoleucine

RT: 0.00 - 50.00 SM: 3B

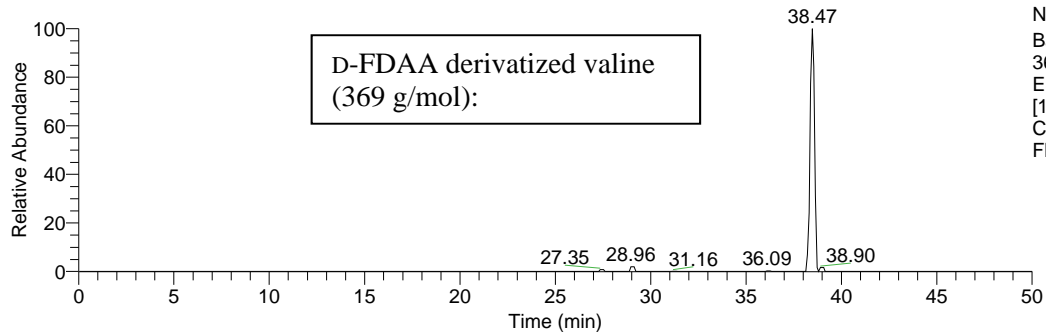

NL: 6.68E5  
Base Peak m/z=  
368.10-368.25 F: - c  
ESI Full ms  
[100.00-2000.00] MS  
CBN\_2228K1\_hydro\_D-  
FDAA

RT: 0.00 - 50.03 SM: 3B

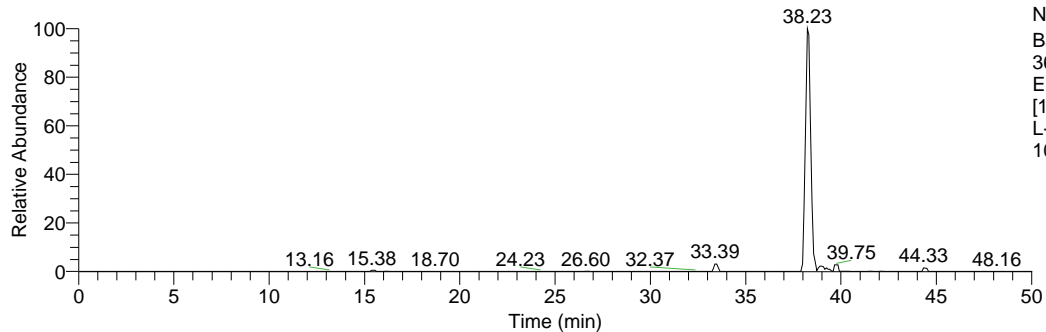

NL: 2.24E6  
Base Peak m/z=  
368.10-368.25 F: - c  
ESI Full ms  
[100.00-2000.00] MS  
L-VAL\_D-FDAA\_2015-  
10-21

RT: 0.00 - 49.98 SM: 3B

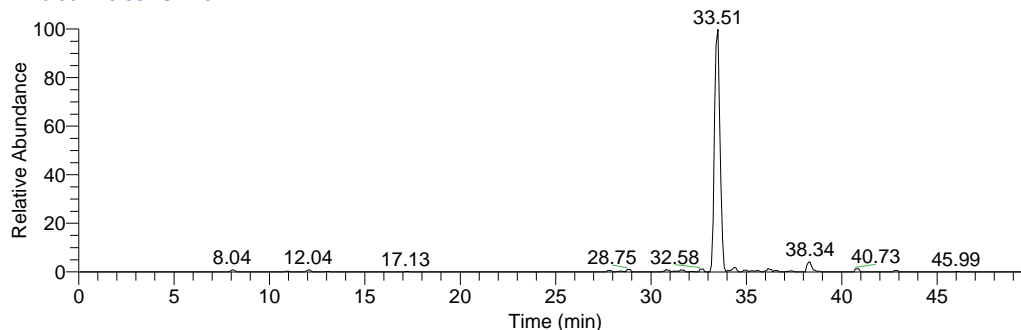

NL: 1.46E6  
Base Peak m/z=  
368.10-368.25 F: - c  
ESI Full ms  
[100.00-2000.00] MS  
D-VAL-D-FDAA\_2015-  
10-21

S10. LC-MS chromatograms of Marfey's analysis hydrolysis and derivatization products of 1, along with derivatized authentic amino acid standards for valine

RT: 0.00 - 50.00

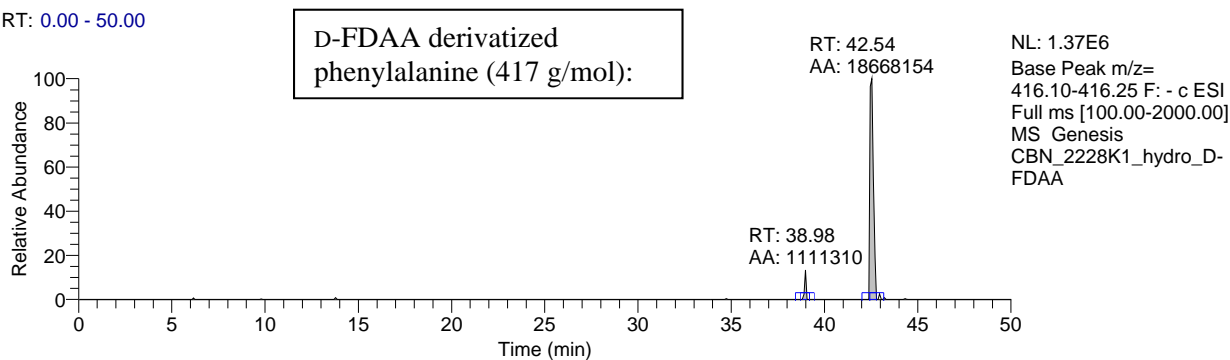

RT: 0.00 - 50.04 SM: 3B

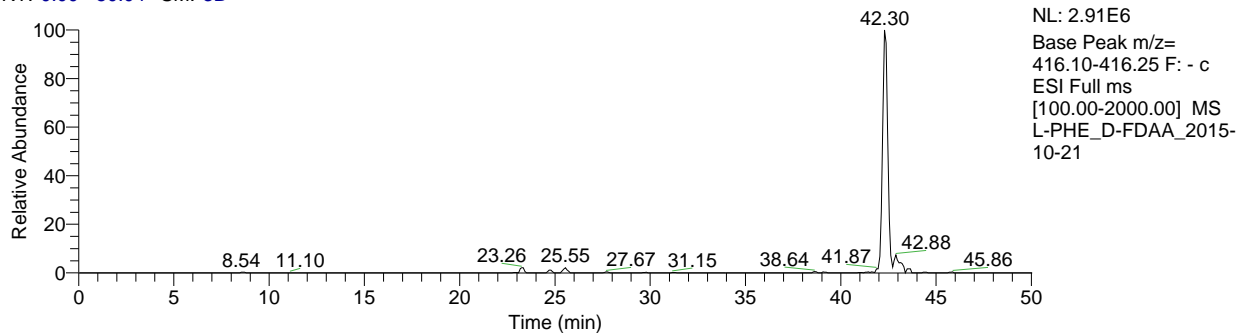

RT: 0.00 - 50.03 SM: 3B

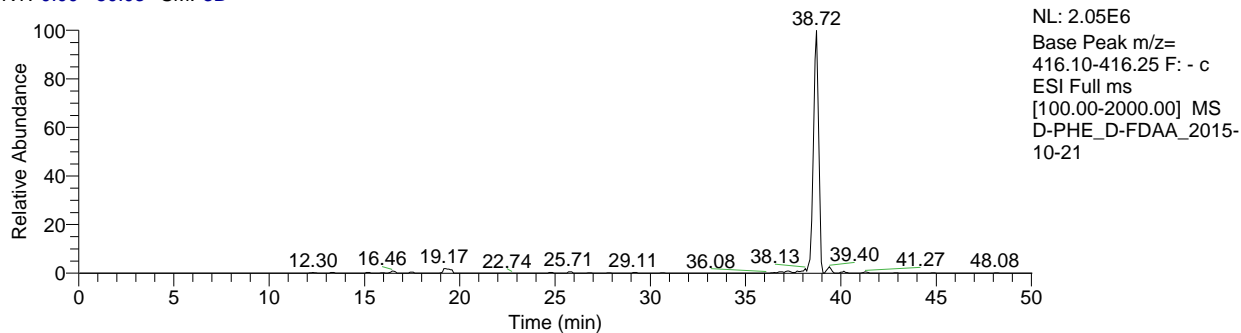

S11. LC-MS chromatograms of Marfey's analysis hydrolysis and derivatization products of 1, along with derivatized authentic amino acid standards for phenylalanine



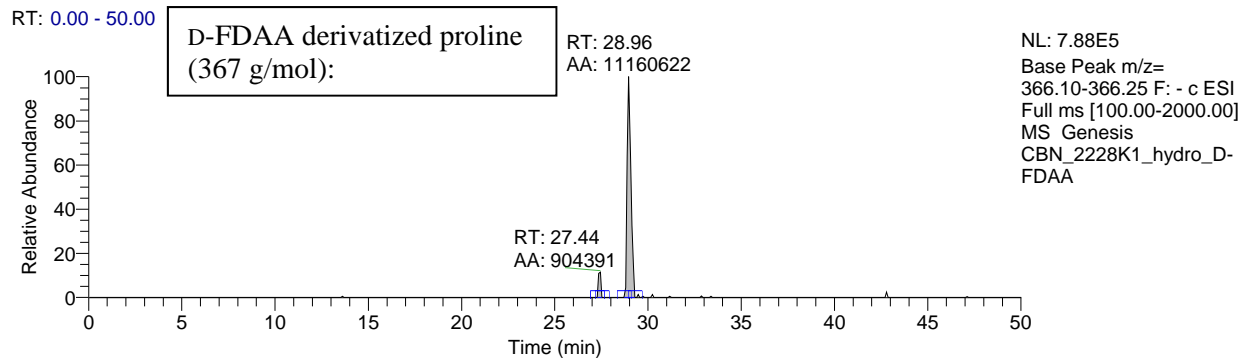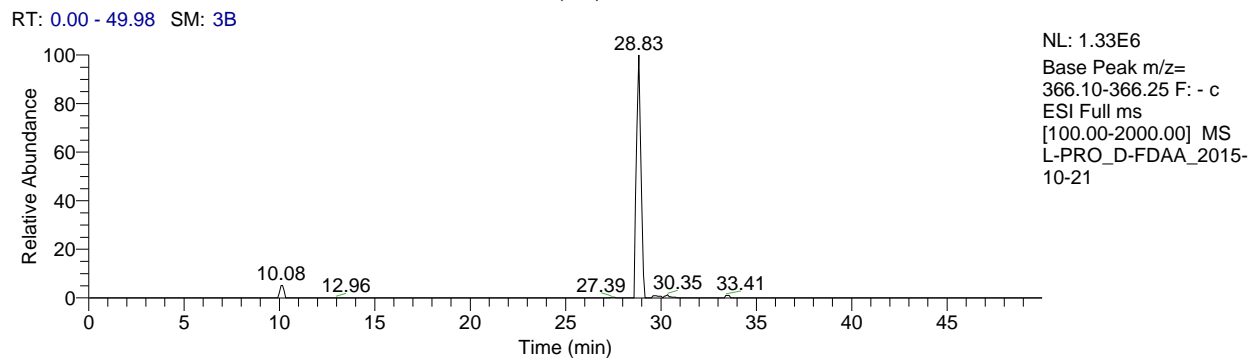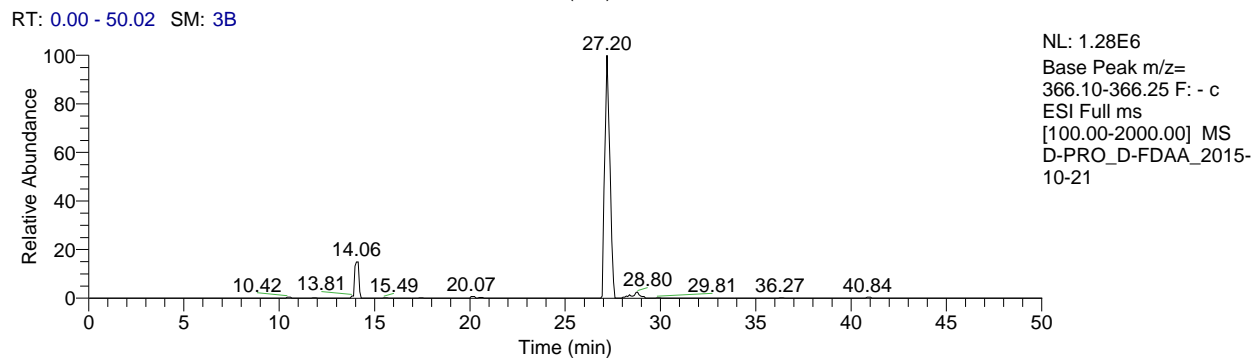

S12. LC-MS chromatograms of Marfey's analysis hydrolysis and derivatization products of 1, along with derivatized authentic amino acid standards for proline

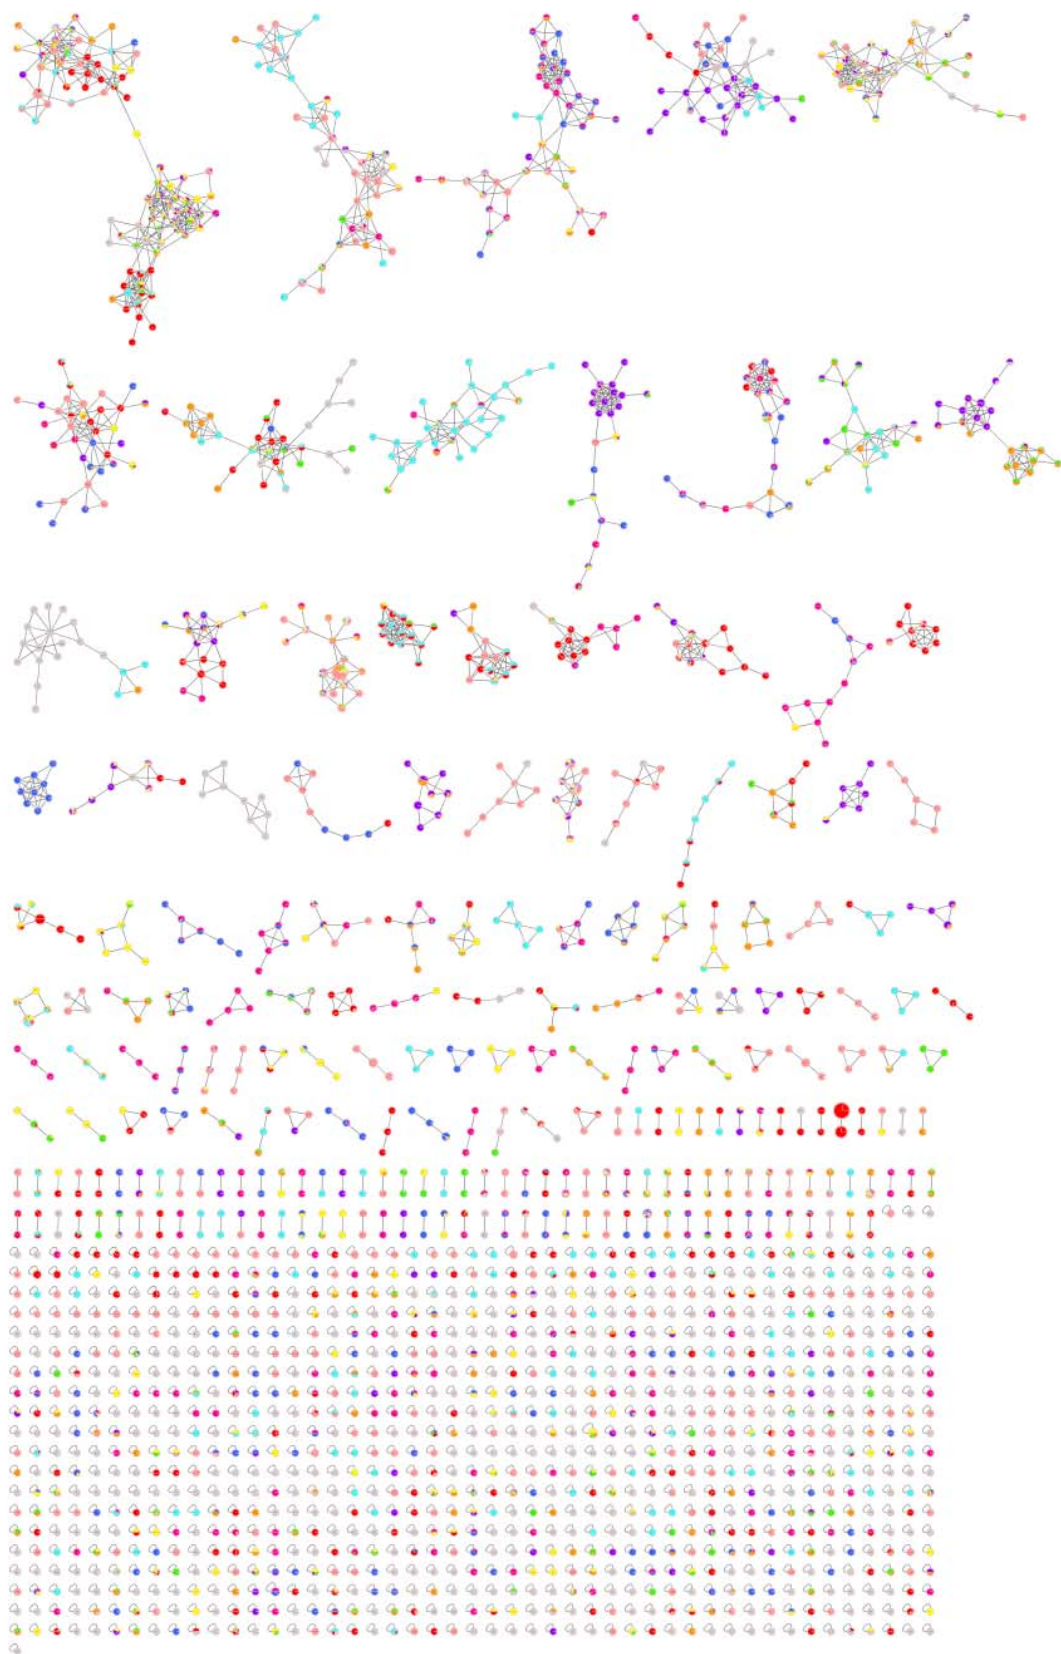

S13.Expanded view of the LC-MS/MS molecular network used to generate Figure 1 in the manuscript.

S14.Molecular model coordinates for the energy minimized conformer of samoamide A (1; PDB format)

HEADER

REMARK Spartan '10 exported M0001

|        |    |   |     |      |        |        |         |
|--------|----|---|-----|------|--------|--------|---------|
| HETATM | 1  | C | UNK | 0001 | 5.075  | 8.586  | -7.110  |
| HETATM | 2  | N | UNK | 0001 | 5.064  | 8.064  | -5.741  |
| HETATM | 3  | C | UNK | 0001 | 4.185  | 7.789  | -8.088  |
| HETATM | 4  | N | UNK | 0001 | 3.125  | 7.143  | -7.488  |
| HETATM | 5  | O | UNK | 0001 | 4.321  | 7.837  | -9.309  |
| HETATM | 6  | C | UNK | 0001 | 5.734  | 6.932  | -5.332  |
| HETATM | 7  | O | UNK | 0001 | 6.294  | 6.165  | -6.109  |
| HETATM | 8  | N | UNK | 0001 | 4.531  | 6.074  | -3.232  |
| HETATM | 9  | C | UNK | 0001 | 3.288  | 6.675  | -3.294  |
| HETATM | 10 | O | UNK | 0001 | 3.127  | 7.687  | -3.986  |
| HETATM | 11 | C | UNK | 0001 | 2.121  | 6.052  | -2.473  |
| HETATM | 12 | N | UNK | 0001 | 0.889  | 6.785  | -2.775  |
| HETATM | 13 | C | UNK | 0001 | 0.672  | 8.033  | -2.229  |
| HETATM | 14 | C | UNK | 0001 | -0.335 | 8.934  | -2.980  |
| HETATM | 15 | O | UNK | 0001 | 1.274  | 8.421  | -1.226  |
| HETATM | 16 | N | UNK | 0001 | -0.289 | 7.445  | -8.925  |
| HETATM | 17 | C | UNK | 0001 | 0.866  | 7.665  | -8.195  |
| HETATM | 18 | C | UNK | 0001 | 2.006  | 6.603  | -8.264  |
| HETATM | 19 | O | UNK | 0001 | 0.982  | 8.676  | -7.490  |
| HETATM | 20 | C | UNK | 0001 | -2.180 | 8.472  | -7.566  |
| HETATM | 21 | O | UNK | 0001 | -1.782 | 8.004  | -6.501  |
| HETATM | 22 | N | UNK | 0001 | -3.365 | 9.190  | -7.651  |
| HETATM | 23 | C | UNK | 0001 | -3.969 | 9.764  | -6.443  |
| HETATM | 24 | C | UNK | 0001 | -4.391 | 8.712  | -5.387  |
| HETATM | 25 | O | UNK | 0001 | -5.017 | 7.694  | -5.689  |
| HETATM | 26 | N | UNK | 0001 | -4.148 | 8.969  | -4.061  |
| HETATM | 27 | C | UNK | 0001 | -3.213 | 9.945  | -3.495  |
| HETATM | 28 | C | UNK | 0001 | -2.613 | 9.388  | -2.183  |
| HETATM | 29 | N | UNK | 0001 | -1.256 | 9.526  | -2.004  |
| HETATM | 30 | O | UNK | 0001 | -3.299 | 8.875  | -1.300  |
| HETATM | 31 | C | UNK | 0001 | 5.719  | 6.740  | -3.795  |
| HETATM | 32 | C | UNK | 0001 | -0.209 | 5.896  | -3.104  |
| HETATM | 33 | C | UNK | 0001 | 0.289  | 4.516  | -2.712  |
| HETATM | 34 | C | UNK | 0001 | 1.801  | 4.611  | -2.871  |
| HETATM | 35 | C | UNK | 0001 | 4.921  | 5.027  | -2.297  |
| HETATM | 36 | C | UNK | 0001 | 6.394  | 5.281  | -2.023  |
| HETATM | 37 | C | UNK | 0001 | 6.886  | 5.851  | -3.342  |
| HETATM | 38 | C | UNK | 0001 | -1.370 | 8.439  | -8.896  |
| HETATM | 39 | C | UNK | 0001 | -0.398 | 6.598  | -10.099 |
| HETATM | 40 | C | UNK | 0001 | -1.866 | 6.671  | -10.464 |
| HETATM | 41 | C | UNK | 0001 | -2.217 | 8.116  | -10.140 |
| HETATM | 42 | C | UNK | 0001 | 6.480  | 8.801  | -7.705  |
| HETATM | 43 | C | UNK | 0001 | 7.380  | 9.655  | -6.838  |
| HETATM | 44 | C | UNK | 0001 | 8.453  | 9.076  | -6.146  |
| HETATM | 45 | C | UNK | 0001 | 9.275  | 9.857  | -5.332  |
| HETATM | 46 | C | UNK | 0001 | 9.034  | 11.223 | -5.204  |
| HETATM | 47 | C | UNK | 0001 | 7.973  | 11.810 | -5.891  |
| HETATM | 48 | C | UNK | 0001 | 7.150  | 11.031 | -6.706  |
| HETATM | 49 | C | UNK | 0001 | 1.622  | 5.198  | -7.734  |
| HETATM | 50 | C | UNK | 0001 | 0.911  | 5.273  | -6.386  |
| HETATM | 51 | C | UNK | 0001 | 2.822  | 4.229  | -7.628  |

|        |     |   |     |      |        |        |         |
|--------|-----|---|-----|------|--------|--------|---------|
| HETATM | 52  | C | UNK | 0001 | 3.526  | 3.985  | -8.955  |
| HETATM | 53  | C | UNK | 0001 | -5.249 | 10.554 | -6.798  |
| HETATM | 54  | C | UNK | 0001 | -5.001 | 11.708 | -7.746  |
| HETATM | 55  | C | UNK | 0001 | -4.260 | 12.826 | -7.338  |
| HETATM | 56  | C | UNK | 0001 | -4.015 | 13.874 | -8.227  |
| HETATM | 57  | C | UNK | 0001 | -4.509 | 13.817 | -9.529  |
| HETATM | 58  | C | UNK | 0001 | -5.254 | 12.714 | -9.942  |
| HETATM | 59  | C | UNK | 0001 | -5.501 | 11.665 | -9.055  |
| HETATM | 60  | C | UNK | 0001 | -3.879 | 11.327 | -3.279  |
| HETATM | 61  | C | UNK | 0001 | -5.019 | 11.309 | -2.256  |
| HETATM | 62  | C | UNK | 0001 | -2.856 | 12.402 | -2.906  |
| HETATM | 63  | C | UNK | 0001 | 0.399  | 9.954  | -3.872  |
| HETATM | 64  | C | UNK | 0001 | 1.516  | 10.812 | -3.239  |
| HETATM | 65  | C | UNK | 0001 | 2.204  | 11.636 | -4.335  |
| HETATM | 66  | C | UNK | 0001 | 1.013  | 11.748 | -2.141  |
| HETATM | 67  | H | UNK | 0001 | 4.586  | 9.566  | -7.026  |
| HETATM | 68  | H | UNK | 0001 | 4.358  | 8.423  | -5.096  |
| HETATM | 69  | H | UNK | 0001 | 2.921  | 7.427  | -6.534  |
| HETATM | 70  | H | UNK | 0001 | 2.333  | 6.143  | -1.403  |
| HETATM | 71  | H | UNK | 0001 | -0.937 | 8.305  | -3.645  |
| HETATM | 72  | H | UNK | 0001 | 2.307  | 6.528  | -9.315  |
| HETATM | 73  | H | UNK | 0001 | -3.451 | 9.775  | -8.472  |
| HETATM | 74  | H | UNK | 0001 | -3.215 | 10.443 | -6.040  |
| HETATM | 75  | H | UNK | 0001 | -4.476 | 8.239  | -3.434  |
| HETATM | 76  | H | UNK | 0001 | -2.405 | 10.059 | -4.217  |
| HETATM | 77  | H | UNK | 0001 | -1.001 | 9.270  | -1.053  |
| HETATM | 78  | H | UNK | 0001 | 5.802  | 7.724  | -3.315  |
| HETATM | 79  | H | UNK | 0001 | -1.120 | 6.170  | -2.562  |
| HETATM | 80  | H | UNK | 0001 | -0.403 | 5.973  | -4.174  |
| HETATM | 81  | H | UNK | 0001 | 0.045  | 4.319  | -1.661  |
| HETATM | 82  | H | UNK | 0001 | -0.155 | 3.720  | -3.316  |
| HETATM | 83  | H | UNK | 0001 | 2.312  | 3.880  | -2.236  |
| HETATM | 84  | H | UNK | 0001 | 2.094  | 4.403  | -3.905  |
| HETATM | 85  | H | UNK | 0001 | 4.331  | 5.049  | -1.379  |
| HETATM | 86  | H | UNK | 0001 | 4.776  | 4.066  | -2.801  |
| HETATM | 87  | H | UNK | 0001 | 6.506  | 6.030  | -1.230  |
| HETATM | 88  | H | UNK | 0001 | 6.928  | 4.377  | -1.720  |
| HETATM | 89  | H | UNK | 0001 | 7.817  | 6.416  | -3.236  |
| HETATM | 90  | H | UNK | 0001 | 7.070  | 5.030  | -4.045  |
| HETATM | 91  | H | UNK | 0001 | -0.930 | 9.440  | -9.006  |
| HETATM | 92  | H | UNK | 0001 | 0.233  | 7.031  | -10.885 |
| HETATM | 93  | H | UNK | 0001 | -0.075 | 5.576  | -9.921  |
| HETATM | 94  | H | UNK | 0001 | -2.055 | 6.411  | -11.509 |
| HETATM | 95  | H | UNK | 0001 | -2.450 | 5.996  | -9.827  |
| HETATM | 96  | H | UNK | 0001 | -1.900 | 8.758  | -10.971 |
| HETATM | 97  | H | UNK | 0001 | -3.296 | 8.242  | -10.018 |
| HETATM | 98  | H | UNK | 0001 | 6.963  | 7.837  | -7.906  |
| HETATM | 99  | H | UNK | 0001 | 6.401  | 9.286  | -8.687  |
| HETATM | 100 | H | UNK | 0001 | 8.651  | 8.009  | -6.238  |
| HETATM | 101 | H | UNK | 0001 | 10.105 | 9.398  | -4.801  |
| HETATM | 102 | H | UNK | 0001 | 9.676  | 11.832 | -4.573  |
| HETATM | 103 | H | UNK | 0001 | 7.788  | 12.877 | -5.795  |
| HETATM | 104 | H | UNK | 0001 | 6.329  | 11.506 | -7.239  |
| HETATM | 105 | H | UNK | 0001 | 0.912  | 4.731  | -8.421  |
| HETATM | 106 | H | UNK | 0001 | -0.047 | 5.793  | -6.476  |
| HETATM | 107 | H | UNK | 0001 | 0.696  | 4.271  | -5.999  |

|         |     |    |     |      |        |        |         |
|---------|-----|----|-----|------|--------|--------|---------|
| HETATM  | 108 | H  | UNK | 0001 | 1.521  | 5.803  | -5.651  |
| HETATM  | 109 | H  | UNK | 0001 | 3.549  | 4.591  | -6.891  |
| HETATM  | 110 | H  | UNK | 0001 | 2.464  | 3.262  | -7.254  |
| HETATM  | 111 | H  | UNK | 0001 | 4.292  | 3.212  | -8.836  |
| HETATM  | 112 | H  | UNK | 0001 | 2.819  | 3.646  | -9.718  |
| HETATM  | 113 | H  | UNK | 0001 | 4.025  | 4.887  | -9.321  |
| HETATM  | 114 | H  | UNK | 0001 | -5.987 | 9.872  | -7.243  |
| HETATM  | 115 | H  | UNK | 0001 | -5.728 | 10.948 | -5.893  |
| HETATM  | 116 | H  | UNK | 0001 | -3.870 | 12.897 | -6.326  |
| HETATM  | 117 | H  | UNK | 0001 | -3.440 | 14.738 | -7.904  |
| HETATM  | 118 | H  | UNK | 0001 | -4.321 | 14.636 | -10.218 |
| HETATM  | 119 | H  | UNK | 0001 | -5.649 | 12.675 | -10.954 |
| HETATM  | 120 | H  | UNK | 0001 | -6.090 | 10.816 | -9.394  |
| HETATM  | 121 | H  | UNK | 0001 | -4.323 | 11.639 | -4.230  |
| HETATM  | 122 | H  | UNK | 0001 | -5.534 | 12.277 | -2.245  |
| HETATM  | 123 | H  | UNK | 0001 | -5.763 | 10.545 | -2.502  |
| HETATM  | 124 | H  | UNK | 0001 | -4.655 | 11.124 | -1.241  |
| HETATM  | 125 | H  | UNK | 0001 | -3.331 | 13.387 | -2.865  |
| HETATM  | 126 | H  | UNK | 0001 | -2.403 | 12.211 | -1.928  |
| HETATM  | 127 | H  | UNK | 0001 | -2.057 | 12.452 | -3.654  |
| HETATM  | 128 | H  | UNK | 0001 | 0.853  | 9.385  | -4.696  |
| HETATM  | 129 | H  | UNK | 0001 | -0.331 | 10.626 | -4.340  |
| HETATM  | 130 | H  | UNK | 0001 | 2.282  | 10.157 | -2.810  |
| HETATM  | 131 | H  | UNK | 0001 | 3.030  | 12.223 | -3.921  |
| HETATM  | 132 | H  | UNK | 0001 | 2.619  | 10.982 | -5.110  |
| HETATM  | 133 | H  | UNK | 0001 | 1.502  | 12.327 | -4.813  |
| HETATM  | 134 | H  | UNK | 0001 | 0.209  | 12.393 | -2.507  |
| HETATM  | 135 | H  | UNK | 0001 | 0.645  | 11.192 | -1.276  |
| HETATM  | 136 | H  | UNK | 0001 | 1.822  | 12.394 | -1.783  |
| CONNECT | 1   | 67 | 2   | 3    | 42     |        |         |
| CONNECT | 2   | 1  | 6   | 68   |        |        |         |
| CONNECT | 3   | 1  | 4   | 5    |        |        |         |
| CONNECT | 4   | 3  | 18  | 69   |        |        |         |
| CONNECT | 5   | 3  |     |      |        |        |         |
| CONNECT | 6   | 2  | 7   | 31   |        |        |         |
| CONNECT | 7   | 6  |     |      |        |        |         |
| CONNECT | 8   | 9  | 31  | 35   |        |        |         |
| CONNECT | 9   | 8  | 10  | 11   |        |        |         |
| CONNECT | 10  | 9  |     |      |        |        |         |
| CONNECT | 11  | 9  | 12  | 34   | 70     |        |         |
| CONNECT | 12  | 11 | 13  | 32   |        |        |         |
| CONNECT | 13  | 12 | 14  | 15   |        |        |         |
| CONNECT | 14  | 13 | 29  | 63   | 71     |        |         |
| CONNECT | 15  | 13 |     |      |        |        |         |
| CONNECT | 16  | 17 | 38  | 39   |        |        |         |
| CONNECT | 17  | 16 | 18  | 19   |        |        |         |
| CONNECT | 18  | 17 | 4   | 49   | 72     |        |         |
| CONNECT | 19  | 17 |     |      |        |        |         |
| CONNECT | 20  | 21 | 22  | 38   |        |        |         |
| CONNECT | 21  | 20 |     |      |        |        |         |
| CONNECT | 22  | 20 | 23  | 73   |        |        |         |
| CONNECT | 23  | 22 | 24  | 53   | 74     |        |         |
| CONNECT | 24  | 23 | 25  | 26   |        |        |         |
| CONNECT | 25  | 24 |     |      |        |        |         |
| CONNECT | 26  | 24 | 27  | 75   |        |        |         |
| CONNECT | 27  | 26 | 28  | 60   | 76     |        |         |

CONNECT 28 27 29 30  
CONNECT 29 28 14 77  
CONNECT 30 28  
CONNECT 31 6 8 37 78  
CONNECT 32 12 33 79 80  
CONNECT 33 32 34 81 82  
CONNECT 34 33 11 83 84  
CONNECT 35 8 36 85 86  
CONNECT 36 35 37 87 88  
CONNECT 37 36 31 89 90  
CONNECT 38 20 16 41 91  
CONNECT 39 16 40 92 93  
CONNECT 40 39 41 94 95  
CONNECT 41 40 38 96 97  
CONNECT 42 1 43 98 99  
CONNECT 43 42 44 48  
CONNECT 44 43 45 100  
CONNECT 45 44 46 101  
CONNECT 46 45 47 102  
CONNECT 47 46 48 103  
CONNECT 48 47 43 104  
CONNECT 49 18 50 51 105  
CONNECT 50 49 106 107 108  
CONNECT 51 49 52 109 110  
CONNECT 52 51 111 112 113  
CONNECT 53 23 54 114 115  
CONNECT 54 53 55 59  
CONNECT 55 54 56 116  
CONNECT 56 55 57 117  
CONNECT 57 56 58 118  
CONNECT 58 57 59 119  
CONNECT 59 58 54 120  
CONNECT 60 27 61 62 121  
CONNECT 61 60 122 123 124  
CONNECT 62 60 125 126 127  
CONNECT 63 14 64 128 129  
CONNECT 64 63 65 66 130  
CONNECT 65 64 131 132 133  
CONNECT 66 64 134 135 136  
CONNECT 67 1  
CONNECT 68 2  
CONNECT 69 4  
CONNECT 70 11  
CONNECT 71 14  
CONNECT 72 18  
CONNECT 73 22  
CONNECT 74 23  
CONNECT 75 26  
CONNECT 76 27  
CONNECT 77 29  
CONNECT 78 31  
CONNECT 79 32  
CONNECT 80 32  
CONNECT 81 33  
CONNECT 82 33  
CONNECT 83 34

CONNECT 84 34  
CONNECT 85 35  
CONNECT 86 35  
CONNECT 87 36  
CONNECT 88 36  
CONNECT 89 37  
CONNECT 90 37  
CONNECT 91 38  
CONNECT 92 39  
CONNECT 93 39  
CONNECT 94 40  
CONNECT 95 40  
CONNECT 96 41  
CONNECT 97 41  
CONNECT 98 42  
CONNECT 99 42  
CONNECT 100 44  
CONNECT 101 45  
CONNECT 102 46  
CONNECT 103 47  
CONNECT 104 48  
CONNECT 105 49  
CONNECT 106 50  
CONNECT 107 50  
CONNECT 108 50  
CONNECT 109 51  
CONNECT 110 51  
CONNECT 111 52  
CONNECT 112 52  
CONNECT 113 52  
CONNECT 114 53  
CONNECT 115 53  
CONNECT 116 55  
CONNECT 117 56  
CONNECT 118 57  
CONNECT 119 58  
CONNECT 120 59  
CONNECT 121 60  
CONNECT 122 61  
CONNECT 123 61  
CONNECT 124 61  
CONNECT 125 62  
CONNECT 126 62  
CONNECT 127 62  
CONNECT 128 63  
CONNECT 129 63  
CONNECT 130 64  
CONNECT 131 65  
CONNECT 132 65  
CONNECT 133 65  
CONNECT 134 66  
CONNECT 135 66  
CONNECT 136 66  
END
